# Supplementary material for: Overexpression of the chloroplastic 2-oxoglutarate/malate transporter disturbs carbon and nitrogen homeostasis in rice
Source: PubMed Central journal article supplement (PMC7816853; doi:10.1093/jxb/eraa343), 2020-07-25
Supplement: eraa343_suppl_supplementary_figures_tables.pdf [file eraa343_suppl_supplementary_figures_tables.pdf]

# **Supplementary Figures**

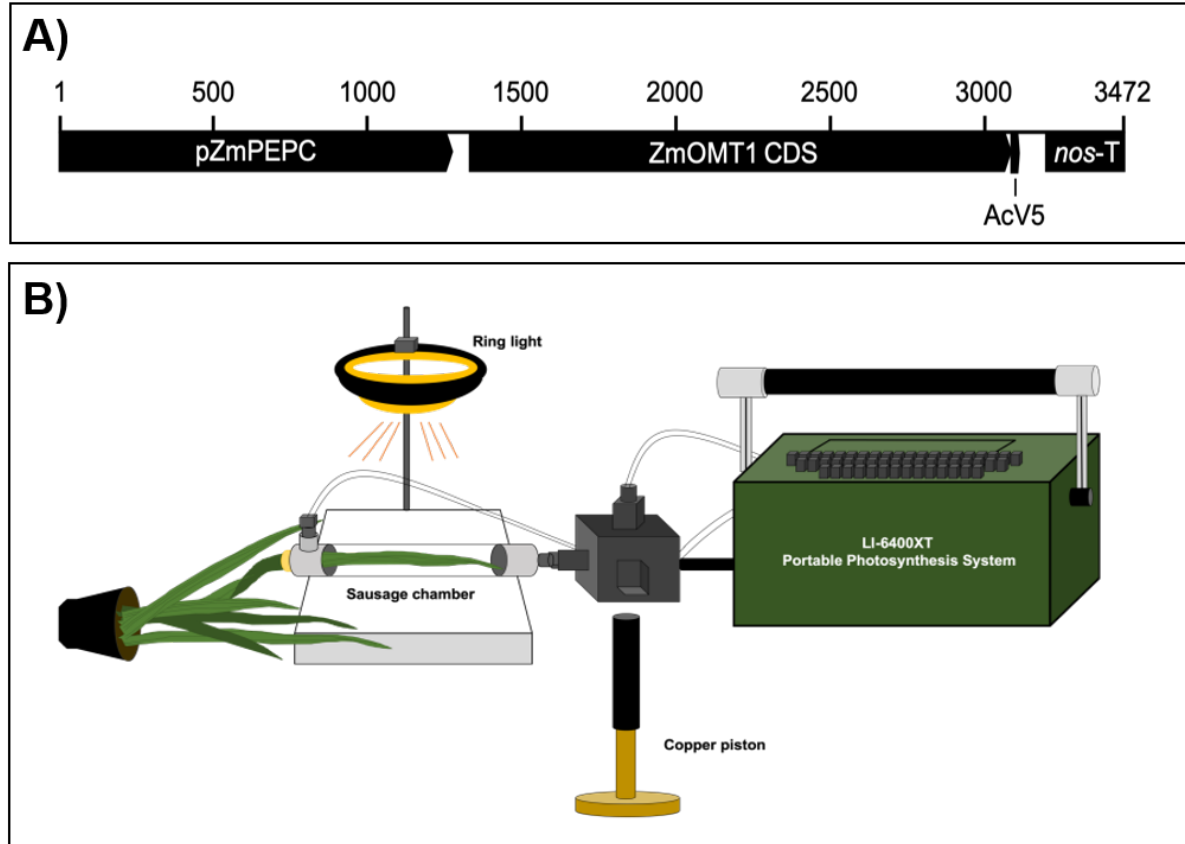

**Fig. S1:** Schematic of the pSC110:*ZmOMT1*:AcV5 construct (**A**). Schematic view of the customized gas exchange assembly and its coupling to the LI-COR 6400-Portable Photosynthesis System (**B**).

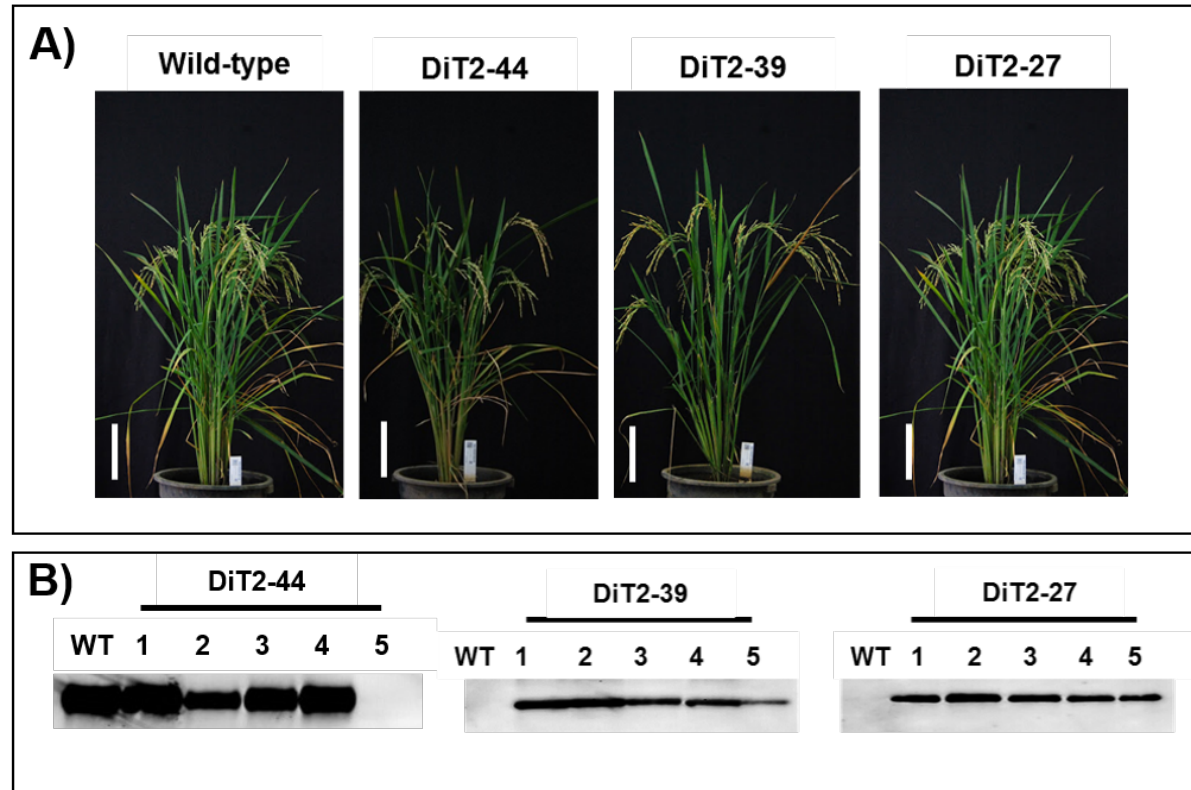

**Fig. S2:** Representative pictures of wild-type, DiT2-44, DiT2-39 and DiT2-27 lines grown under ambient conditions; 80 days post germination (DPG). The MW of DiT2-AcV5 is 40 kDa. Scale bar: 15 cm **(A)**. Western-blot analysis of *ZmDiT2-AcV5* protein expression in rice DiT2-44, DiT2-39 and DiT2-27 leaves at mid-tilling stage. WT, wild-type plants **(B)**.

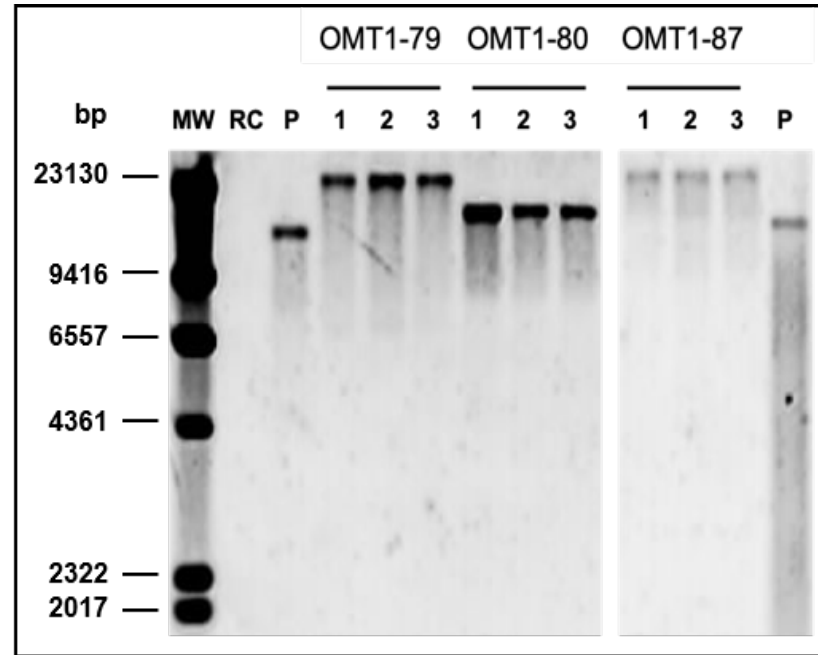

**Fig. S3:** DNA blots show that the OMT1 lines (OMT1-79, OMT1-80 and OMT1-87) carry a single copy of the *ZmOMT1* CDS and are homozygous at the T<sub>3</sub> generation. Untransformed rice control plants (RC) are negative controls for the transgene. The vector plasmid (P) is a positive control. A DIG-labeled DNA molecular marker indicates molecular weight (MW).

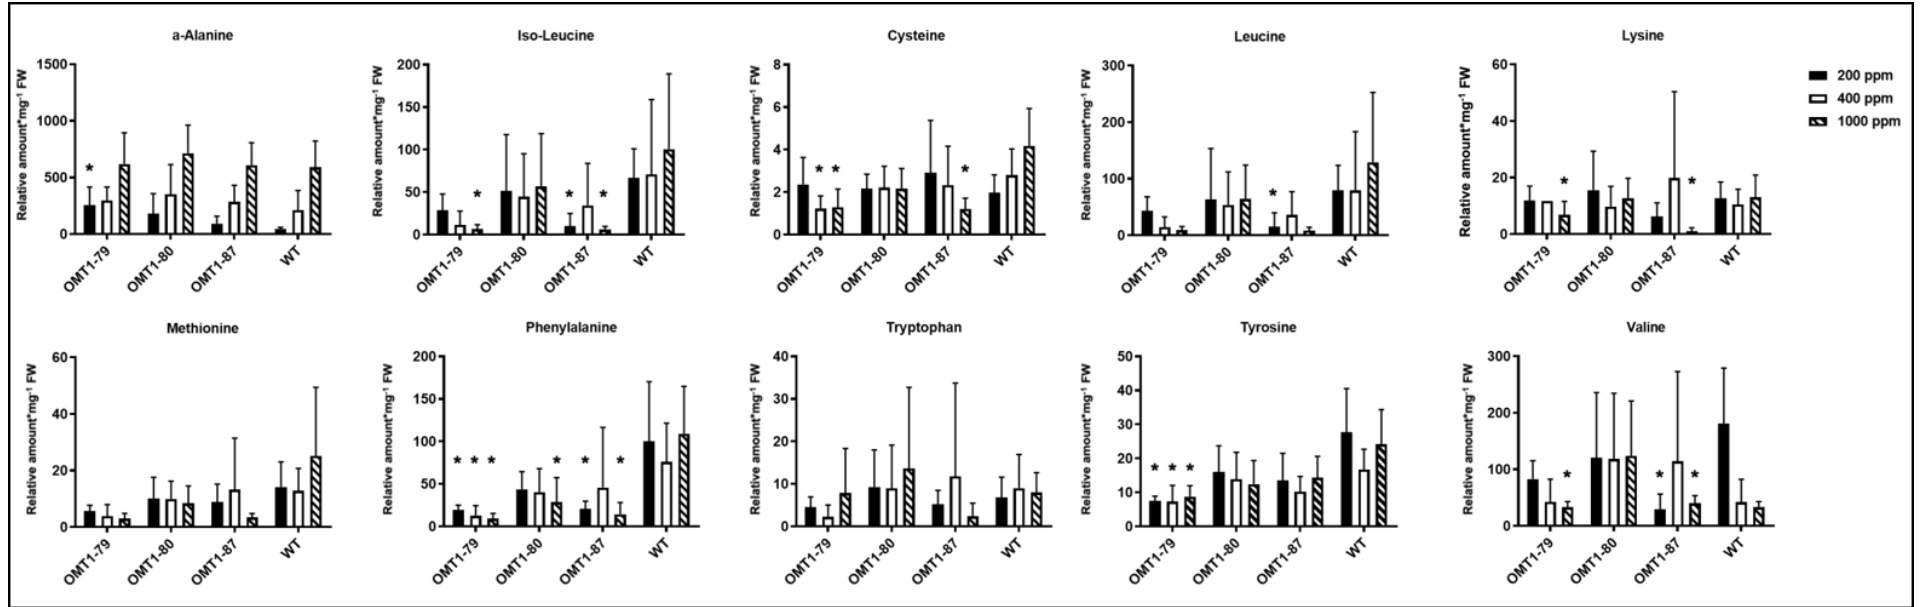

**Fig. S4:** Relative amount of some individual amino acids in OMT1 lines (OMT1-79, OMT1-80 and OMT1-87) and wild-type (WT) plants under different CO<sub>2</sub> concentrations (200, 400 and 1000 ppm). Value represent the mean ± SEM, n=5, significantly differences are indicated \*  $P \leq 0.05$ , Student's t-test

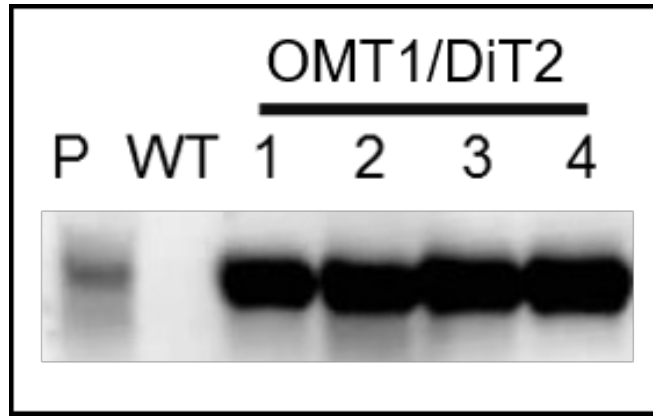

**Fig. S5:** Western blot analysis of *ZmOMT1* and *ZmDiT2* protein expressions in rice crosses lines of OMT1/ DiT2 (1, 2, 3 and 4). P; OMT1-AcV5 plant (positive control). WT; wild-type plant (negative control).

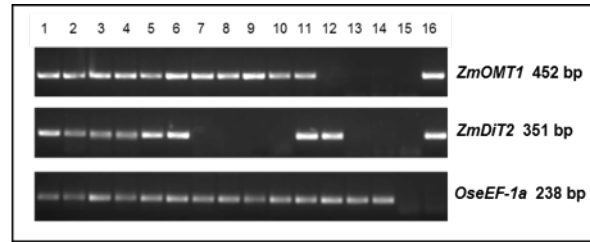

| Well No. | Sample                        |
|----------|-------------------------------|
| 1        | OMT1-79/DiT2-44-1             |
| 2        | OMT1-79/DiT2-44-2             |
| 3        | OMT1-45/DiT2-27-1             |
| 4        | OMT1-45/DiT2-27-2             |
| 5        | OMT1-80/DiT2-39-1             |
| 6        | OMT1-80/DiT2-39-2             |
| 7        | OMT1-79-1                     |
| 8        | OMT1-79-2                     |
| 9        | OMT1-45-1                     |
| 10       | OMT1-80-1                     |
| 11       | OMT1-79/DiT2-44-3             |
| 12       | DiT2-44-1                     |
| 13       | WT                            |
| 14       | WT                            |
| 15       | Water                         |
| 16       | Plasmids of ZmOMT1 and ZmDiT2 |

**Figure. S6:** RT-PCR of *ZmOMT1* and *ZmDiT2* mRNA expressions in OMT1/DiT2 double transgenic lines together with wild-type (WT). RT-PCR of rice housekeeping gene *OseEF-1a* was used as a positive and quality control. The PCR condition were: 95°C for 3 min; 40 cycles of 95°C for 20 sec, 55°C for 30 sec and 72°C for 45 sec; and 72°C for 3 min. RNA was extracted from leaf materials using TRIzol reagent and treated with DNase and the PCR products were electrophoresed on 2% agarose gel.

# Supplementary Tables



**Table S1. Primers used in this study**

| <b>Target Gene</b>                                             | <b>Forward Primer</b>        | <b>Reverse Primer</b>                                          |
|----------------------------------------------------------------|------------------------------|----------------------------------------------------------------|
| <i>ZmPEPC</i> promoter (GRMZM2G083841; base pairs –1212 to +1) | CACCATGGTCGACGC<br>GTCCTCCAC | TCAAGACCAGCCGCTCGCATCTTTCCAAGACCACAGCC<br>CGATTATCTTC          |
| <i>ZmOMT1</i> for PCR screening                                | CGTGGGATACCCTTA<br>CATGG     | CCCGATTATCTTCCACCAGA                                           |
| <i>OsOMT1</i> for qPCR                                         | ATGGAATTGGGTCTG<br>CTCCTG    | AATCCATACCCCCACCACTG                                           |
| <i>ZmOMT1</i> for qRT-PCR                                      | GTGGGGCTATGGGTT<br>TGTCA     | TATCTTCCACCAGAAGCCGC                                           |
| <i>ZmOMT1</i> for RT-PCR                                       | CGTGGGATACCCTTA<br>CATGG     | CCCGATTATCTTCCACCAGA                                           |
| <i>ZmDiT2</i> for RT-PCR                                       | GTTGGAATGGCAGGA<br>CAACT     | ACCCAGCCTGAAAACATCTG                                           |
| <i>OseEF-1a</i> for RT-PCR control                             | CAACATTGTGGTCAT<br>TGGCC     | GCAGTAGTACTTGGTGGTCT                                           |
| <i>ZmPEPC</i> -promoter for digoxigenin labelled probe         | TCCCGAGTTCCTAAC<br>CACAG     | GTGGCTGAGGCTTCTTTTTG                                           |
| Cloning of <i>ZmDiT2</i> for overexpression in rice            | CACCATGGAGCTCCA<br>CCTCGCCAC | TCAAGACCAGCCGCTCGCATCTTTCCAAGAGTACAGAC<br>CCAAAAATTTCCACCAGATG |

**Table S2:** Vcmax and Jmax based on ACi Data at 21% or 2% O<sub>2</sub> using the PsFit Model.

|                  | <b>Vcmax 25°C</b><br>( $\mu\text{mol m}^{-2} \text{s}^{-1}$ ) | <b>Jmax 25°C</b><br>( $\mu\text{mol m}^{-2} \text{s}^{-1}$ ) | <b>Vcmax 25°C</b><br>( $\mu\text{mol m}^{-2} \text{s}^{-1}$ ) | <b>Jmax 25°C</b><br>( $\mu\text{mol m}^{-2} \text{s}^{-1}$ ) |
|------------------|---------------------------------------------------------------|--------------------------------------------------------------|---------------------------------------------------------------|--------------------------------------------------------------|
|                  | <b>21% O<sub>2</sub></b>                                      |                                                              | <b>2% O<sub>2</sub></b>                                       |                                                              |
| <b>Wild-type</b> | 93.77 $\pm$ 7.82 <sup>a</sup>                                 | 176.18 $\pm$ 18.19 <sup>a</sup>                              | 121.7 $\pm$ 10.91 <sup>a</sup>                                | 154.77 $\pm$ 11.58 <sup>ab</sup>                             |
| <b>OMT1-79</b>   | 65.06 $\pm$ 5.75 <sup>bc</sup>                                | 140.78 $\pm$ 6.59 <sup>ab</sup>                              | 72.41 $\pm$ 11.28 <sup>b</sup>                                | 114.52 $\pm$ 8.86 <sup>c</sup>                               |
| <b>OMT1-80</b>   | 86.47 $\pm$ 12.59 <sup>ab</sup>                               | 167.72 $\pm$ 20.71 <sup>a</sup>                              | 124.68 $\pm$ 25.39 <sup>a</sup>                               | 171.03 $\pm$ 20.73 <sup>a</sup>                              |
| <b>OMT1-87</b>   | 58.59 $\pm$ 14.15 <sup>c</sup>                                | 122.48 $\pm$ 20.16 <sup>b</sup>                              | 100.04 $\pm$ 18.48 <sup>ab</sup>                              | 126.45 $\pm$ 21.21 <sup>bc</sup>                             |

Vcmax, maximum rate of Rubisco carboxylation allowed by Rubisco; Jmax, maximum rate of electron transport. Value represent the mean  $\pm$  SEM, n=5. Different letters within groups indicate that values are statistically different  $p \leq 0.05$ , Tukey's multiple comparison test. ns indicates non-significant,  $p > 0.05$ .
